# Supplementary material for: Molecular crypsis by pathogenic fungi using human factor H. A numerical model
Source: PLOS journal article supplement (doi:10.1371/journal.pone.0212187), 2019-02-19
Supplement: S10 (10.1371/journal.pone.0212187.s010) [file journal.pone.0212187.s010]

**S1 Table.** Complement protein concentrations used in the model, as proposed by [2].

| Complement proteins | Concentration ( $\mu\text{M}$ ) | Source |
|---------------------|---------------------------------|--------|
| C3                  | 5.4                             | [8]    |
| Factor H            | 3.2                             | [8]    |
| Factor B            | 2.2                             | [8]    |
| Factor D            | 0.083                           | [8]    |
| Factor I            | 0.4                             | [8]    |
