# Supplementary material for: Molecular crypsis by pathogenic fungi using human factor H. A numerical model
Source: PLOS journal article supplement (doi:10.1371/journal.pone.0212187), 2019-02-19
Supplement: S11 (10.1371/journal.pone.0212187.s011) [file journal.pone.0212187.s011]

**S2 Table. Kinetic rate constants used in the model, as proposed by [2].**

| Biochemical reaction                                  | Rate Constant                 | Value                                             | Source                                                 |
|-------------------------------------------------------|-------------------------------|---------------------------------------------------|--------------------------------------------------------|
| Hydrolysis of C3(H <sub>2</sub> O)                    | $k_{C3H_2O}^+$                | $8.3 \times 10^{-10} \text{ ms}^{-1}$             | [9]                                                    |
| Association of factor B to C3b                        | $k_{C3bB}^+$                  | $0.000\,213 \mu\text{M}^{-1} \text{ ms}^{-1}$     | [10]                                                   |
| Dissociation of complex C3bB                          | $k_{C3bB}^-$                  | $0.000\,155 \text{ ms}^{-1}$                      | [10]                                                   |
| Attachment of fnC3b to host and pathogen              | $k_{fC3b}^+$                  | $0.42 \mu\text{M}^{-1} \text{ ms}^{-1}$           | Calculated, see S2 Appendix                            |
| Attachment of hnC3b to host                           | $k_{hC3b}^+$                  | varying                                           | Calculated, see S5 Appendix                            |
| Attachment of pnC3b to pathogen                       | $k_{pC3b}^+$                  | varying                                           | Calculated, see S5 Appendix                            |
| Association of nC3b (fnC3b, hnC3b and pnC3b) to water | $k_{nC3b}^-$                  | $11.55 \text{ ms}^{-1}$                           | Calculated, see S3 Appendix                            |
| Association of factor H to C3b                        | $k_{C3bH}^+$                  | $0.0052 \mu\text{M}^{-1} \text{ ms}^{-1}$         | [11]                                                   |
| Dissociation of complex C3bH                          | $k_{C3bH}^-$                  | $0.0325 \text{ ms}^{-1}$                          | [11]                                                   |
| Association of factor H to heparin dp32/dp36 (HS)     | $k_{HSH}^+$                   | $0.0065 \mu\text{M}^{-1} \text{ ms}^{-1}$         | [12], estimated from dissociation constant             |
| Dissociation of complex HSH                           | $k_{HSH}^-$                   | $0.003\,25 \text{ ms}^{-1}$                       | [12], estimated from dissociation constant             |
| Association of factor H to Pra1                       | $k_{Pra1H}^+$                 | $0.8673 \mu\text{M}^{-1} \text{ ms}^{-1}$         | own measurements, estimated from dissociation constant |
| Dissociation of complex Pra1H                         | $k_{Pra1H}^-$                 | $0.001\,62 \text{ ms}^{-1}$                       | own measurements, estimated from dissociation constant |
| Inflow of factor H                                    | $k_H^+$                       | $4.88 \times 10^{-5} \mu\text{M} \text{ ms}^{-1}$ | Calculated, see S6 Appendix                            |
| Inflow of C3                                          | $k_{C3}^+$                    | $8.23 \times 10^{-5} \mu\text{M} \text{ ms}^{-1}$ | Calculated, see S6 Appendix                            |
| Outflow of FH and C3                                  | $k_{blood}^-$                 | $1.525 \times 10^{-5} \text{ ms}^{-1}$            | Calculated, see S6 Appendix                            |
| Activation of complex C3bB by Factor D                | $k_{cat}C3bB$<br>$K_M C3bB$   | $0.0021 \text{ ms}^{-1}$<br>$0.1 \mu\text{M}$     | [2]                                                    |
| Cleavage of C3 by C3 convertase, C3bBb                | $k_{cat}C3bBb$<br>$K_M C3bBb$ | $0.0018 \text{ ms}^{-1}$<br>$5.9 \mu\text{M}$     | [13]                                                   |
| Cleavage of C3b by inhibitor Factor I                 | $k_{cat}C3bH$<br>$K_M C3bH$   | $0.0013 \text{ ms}^{-1}$<br>$0.25 \mu\text{M}$    | [11]                                                   |
